1 **Prior vaccination with the rVSV-ZEBOV vaccine does not interfere with but improves the**  
2 **efficacy of postexposure antibody treatment in nonhuman primates exposed to Ebola virus**

3

4 Robert W. Cross<sup>1,2\*</sup>, Zachary A. Bornholdt<sup>3\*</sup>, Abhishek N. Prasad<sup>1,2\*</sup>, Joan B. Geisbert<sup>1,2</sup>,  
5 Viktoriya Borisevich<sup>1,2</sup>, Krystle N. Agans<sup>1,2</sup>, Daniel J. Deer<sup>1,2</sup>, Kevin Melody<sup>1,2</sup>, Karla A.  
6 Fenton<sup>1,2</sup>, Heinz Feldmann<sup>4</sup>, Armand Sprecher<sup>5</sup>, Larry Zeitlin<sup>3</sup>, Thomas W. Geisbert<sup>1,2</sup>

7

8 <sup>1</sup>Galveston National Laboratory and <sup>2</sup>Department of Microbiology and Immunology, University  
9 of Texas Medical Branch, 301 University Blvd, Galveston, TX, 77555-0610, USA. <sup>3</sup>Mapp  
10 Biopharmaceutical, Inc. 6160 Lusk Blvd Ste C200, San Diego, CA 92121, USA. <sup>4</sup>Laboratory of  
11 Virology, Division of Intramural Research, NIAID/NIH, Hamilton, MT, USA. <sup>5</sup>Médecins Sans  
12 Frontières, Rue Arbre Benit 46, 1050, Brussels, Belgium.

13

14 \*These authors contributed equally

15

16 To whom correspondence should be addressed. Tel: 409-266-6906; E-mail: [twgeisbe@utmb.edu](mailto:twgeisbe@utmb.edu)

17 **Abstract:**

18 A replication-competent, vesicular stomatitis virus vaccine expressing the Ebola virus (EBOV)  
19 glycoprotein (GP) (rVSV-ZEBOV) was successfully used during the 2013-16 EBOV epidemic<sup>1</sup>.  
20 Additionally, chimeric and human monoclonal antibodies (mAb) against the EBOV GP showed  
21 promise in animals and EBOV patients when administered therapeutically<sup>2-6</sup>. Given the large  
22 number of at-risk humans being prophylactically vaccinated with rVSV-ZEBOV, there is  
23 uncertainty regarding whether vaccination would preclude use of antibody treatments in the event  
24 of a known exposure of a recent vaccinee. To model a worst-case scenario, we performed a study  
25 using rhesus monkeys vaccinated or unvaccinated with the rVSV-ZEBOV vaccine. One day after  
26 vaccination, animals were challenged with a uniformly lethal dose of EBOV. Five vaccinated  
27 animals and five unvaccinated animals were then treated with the anti-EBOV GP mAb-based  
28 therapeutic MIL77 starting 3 days postexposure. Additionally, five vaccinated macaques received  
29 no therapeutic intervention. All five macaques that were vaccinated and subsequently treated with  
30 MIL77 showed no evidence of clinical illness and survived challenge. In contrast, all five animals  
31 that only received the rVSV-ZEBOV vaccine became ill and 2/5 survived; all five macaques that  
32 only received MIL77 only also became ill and 4/5 survived. Enhanced efficacy of vaccinated  
33 animals that were treated with MIL77 was associated with delayed EBOV viremia attributed to  
34 the vaccine. These results suggest that rVSV-ZEBOV augments immunotherapy.

35

36

37

38

39           Outbreaks of filovirus disease have become increasingly difficult to manage due to  
40 increased connectivity in endemic regions coupled with inadequate public health infrastructures  
41 and lack of approved medical countermeasures including diagnostics, therapeutics, and vaccines.  
42 Due to the sporadic nature of these outbreaks, the development and efficacy testing of preventative  
43 vaccines and postexposure treatments has previously been limited to animal models, including  
44 nonhuman primates, in which complete protection from lethal EBOV challenge has been  
45 demonstrated<sup>7-9</sup>. The unprecedented magnitude of the 2013-16 West African EBOV epidemic  
46 offered a unique opportunity to assess the efficacy of some of the most promising medical  
47 countermeasures available at that time<sup>7,8</sup>. Notably, the rVSV-ZEBOV vaccine was shown to  
48 provide 100% efficacy (95% CI 68·9–100·0, p=0·0045) when used in Guinea in a ring vaccination,  
49 open-label, cluster-randomized Phase III clinical trial<sup>1</sup>. The same vaccine has reportedly shown  
50 similar levels of success on a larger scale in the current outbreak of EBOV in the Democratic  
51 Republic of Congo (DRC), having been administered to over 200,000 people<sup>10</sup>. Built on the  
52 successes of years of development and validation in the field during two major ebolavirus  
53 outbreaks, the rVSV-ZEBOV vaccine (licensed as Ervebo<sup>TM</sup>) was recently approved for human  
54 use by both the US FDA and the European Union<sup>11</sup>. Due to the widespread deployment of the  
55 rVSV-ZEBOV vaccine within a hot zone and to medical professionals, vaccinated individuals may  
56 encounter high risk exposures to EBOV prior to the development of protective immunity. The  
57 post-vaccination window of susceptibility has raised questions and concerns around the use of  
58 EBOV therapeutic options for such cases. The most significant concern regards the impact of  
59 potentially detrimental interference resulting from co-administration of a vaccine displaying  
60 EBOV GP as an immunogen with therapeutic mAbs that target EBOV GP, currently the most  
61 effective postexposure EBOV interventions available for human use<sup>2-6</sup>.

62 Previous studies have shown that the rVSV-ZEBOV vaccine causes a transient viremia in  
63 nonhuman primates (NHP) between days 2 and 4 after vaccination<sup>12,13</sup>. The half-life of rVSV-  
64 ZEBOV GP antigen in tissues of vaccinated primates is unknown; however, the presence of rVSV-  
65 ZEBOV GP in tissues was only detected in 2/6 pigs at day 3 post vaccination<sup>14</sup>. Thus, either  
66 circulating rVSV-ZEBOV or expression of EBOV GP from rVSV-ZEBOV-infected tissues could  
67 interfere with subsequent administration of any mAb-based therapeutic targeting EBOV GP.

68 In order to address the potential issue of vaccine/therapeutic or therapeutic/vaccine  
69 interference we employed a uniformly lethal rhesus macaque model of EBOV infection<sup>9</sup>. In brief,  
70 sixteen animals were divided into three experimental groups (n=5/group) and one control animal.  
71 Animals in one group were given the rVSV-ZEBOV vaccine on day -1 and then received the anti-  
72 EBOV GP mAb therapeutic MIL77 on days 3, 6, and 9 at 20 mg/kg/dose after EBOV exposure.  
73 The MIL77 immunotherapeutic was selected based on availability and previous results in EBOV-  
74 challenged NHPs<sup>5</sup>. We reduced the dose of MIL77 from a therapeutically proven dose of 50 mg/kg  
75 to 20 mg/kg<sup>5</sup> to deliver a dose on the margin of protection and accentuate any potential interference  
76 from the rVSV-ZEBOV vaccine. Animals in the second experimental group only received the  
77 rVSV-ZEBOV vaccine on day -1 and animals in the third experimental group were only treated  
78 with MIL77 on days 3, 6, and 9 post-infection (dpi) (20 mg/kg/dose). The single EBOV challenge  
79 control animal was not vaccinated or given mAb therapy and succumbed to disease 9 days  
80 postexposure. Importantly, 12 historical control rhesus macaques challenged via the same route  
81 with the same EBOV seed stock and target dose all succumbed 6 to 9 days after challenge (**Figure**  
82 **1a**)<sup>9,15</sup>.

83 The unvaccinated/untreated control animal developed clinical symptoms of EBOV disease  
84 (EVD) beginning at 5 dpi (**Figure 1b, Supplementary Table 1**), and succumbed to disease at 9

85 dpi (**Figure 1a**). Animals that were either vaccinated day -1 with rVSV-ZEBOV or treated day 3,  
86 6, and 9 dpi with MIL77 all developed clinical illness with 2/5 and 4/5 animals in each group  
87 surviving, respectively (**Figure 1c,d**). Notably, all five animals that were vaccinated day -1 with  
88 rVSV-ZEBOV and subsequently treated on days 3, 6, and 9 with MIL77 survived to the study  
89 endpoint (28 dpi) without developing any clinical signs of EVD. There was a significant difference  
90 in survival between the rVSV-ZEBOV + MIL77 treated group and the control animal ( $p = 0.0253$ ,  
91 Mantel-Cox log-rank test), and between the rVSV-ZEBOV + MIL77 and rVSV-ZEBOV treatment  
92 groups ( $p=0.0486$ , Mantel-Cox log rank test) (**Figure 1a**). No significant difference was detected  
93 between the experimental control animal in this study and historical control (HC) rhesus macaques  
94 ( $N=12$ ). However, differences were detected when comparing the experimental treatment groups  
95 with the HC NHPs ( $p= 0.0003$  for rVSV-ZEBOV + MIL77 vs. HC;  $p= 0.0072$  for rVSV-ZEBOV  
96 vs. HC;  $p= 0.0009$  for MIL77 vs. HC).

97         There were notable differences in clinical pathology and the course of EVD between the  
98 experimental treatment groups. A single animal (VSV/mAb-1) in the dual-treatment group  
99 developed fever 1 dpi, which was most likely vaccine associated, whereas the control animal and  
100 4/5 animals each in the vaccination only and mAb treatment only groups developed fever 6-9 dpi,  
101 which coincided with the appearance of other signs of EVD (**Figure 1b-d, Supplementary Tables**  
102 **2,3**). Post-mortem pathological findings in the control animal and vaccinated or treated animals  
103 that succumbed was consistent with previous reports of EVD in macaques (**Figure 3d, h, l, p, t,**  
104 **and x**)<sup>16,17</sup>. Animals surviving challenge, including all animals in the rVSV-ZEBOV + MIL77  
105 treatment group, exhibited no significant gross or histopathological findings (**Figure 3a-c, e-g, i-**  
106 **k, m-o, q-s, u-w**).

107 Infectious rVSV-ZEBOV was detected by plaque assay up to 2 days post-vaccination in  
108 all vaccinated animals except one (VSV/mAb-4) which had low level (1.4 log<sub>10</sub> pfu/ml) viremia  
109 on day 4 post-vaccination. Detection of circulating EBOV genomic RNA (vRNA) and infectious  
110 virus was performed by RT-qPCR and plaque assay titration, respectively. Consistent with  
111 historical controls challenged with the same EBOV seed stock, the experimental control animal  
112 had 2 log<sub>10</sub> pfu/ml of infectious EBOV by 3 dpi and 8.46 log<sub>10</sub> GEq of vRNA by 6 dpi, which then  
113 peaked on 9 dpi at euthanasia for both detection methods (**Figure 2a, Supplementary Figure 1**).  
114 The vaccine only group had detectable EBOV vRNA by 6 dpi in 4/5 animals and by 9 dpi in the  
115 remaining animal (**Figure 2d**). Infectious EBOV was detected in the same group by 6 dpi in 2/5  
116 animals with peak viral titers comparable to both the experimental and HC animals (**Figure 2c,**  
117 **Supplementary Figure 1**). In the MIL77 only group, EBOV vRNA was detected by 3 dpi in 3/5  
118 animals and in 5/5 by 9 dpi . Likewise, infectious EBOV was detected in 3/5 animals by 3 dpi  
119 (**Figure 2e**). Infectious virus became undetectable in two surviving animals by 9 dpi, while the  
120 third animal was euthanized at 9 dpi. In stark contrast, none of the rVSV-EBOV + MIL77 animals  
121 had detectable circulating infectious EBOV or EBOV vRNA at any point postexposure (**Figure**  
122 **2a, b**), consistent with the total lack of clinical scoring in this group.

123 We used ELISA-based detection to estimate total host derived anti-VP40 IgM and IgG as  
124 well as anti-GP IgM (**Figure 4**). Notably, the rVSV-ZEBOV + MIL77 group (3/5) and the rVSV-  
125 ZEBOV animals that survived (2/5) had detectable IgM to VP40 and GP by 6 dpi (**Figure**  
126 **4a,b,d,e**), yet the IgM responses in the MIL77 group were at or below the limit of detection for  
127 the assays (**Figure 4c,f**). All animals from the rVSV-ZEBOV + MIL77 and any surviving animals  
128 from the rVSV-ZEBOV or MIL77 groups had clear evidence of circulating IgG antibodies against  
129 VP40 at 9 dpi through the end of the study (**Figure 4g-i**). Circulating amounts of MIL77 were

130 equivalent across both mAb treated groups through the acute phase of disease; however, a slightly  
131 faster rate of decay was noted in 2/5 of the MIL77 only animals at study endpoint (**Figure 4j**).

132         The 2013-16 West African and current EBOV epidemic in the DRC, both of previously  
133 unprecedented proportion, have demonstrated the critical need for efficacious medical  
134 countermeasures. However, the potential for deleterious interference between different modes of  
135 treatment presents a possible barrier to the development and approval of protocols utilizing a  
136 combinatorial approach. Studies in NHPs investigating protection by the rVSV-ZEBOV vaccine  
137 when administered as a postexposure intervention have demonstrated only partial protection  
138 suggesting that additional postexposure countermeasures may be necessary<sup>18,19</sup>. Indeed,  
139 seroconversion offering protective immunity does not occur before 3 days post-vaccination in  
140 NHPs<sup>20</sup>, and the same is likely true in humans<sup>21</sup>. Given that all current candidate postexposure  
141 mAb therapeutics in clinical trials target the EBOV GP, which is also the antigenic immunogen  
142 displayed by the rVSV-ZEBOV vaccine vector, significant concern exists regarding the potential  
143 for interference between these types of products. Accordingly, we performed a narrowly focused  
144 study utilizing rhesus monkeys to model a scenario likely occurring during the current outbreak in  
145 DRC; namely, high-risk exposure to EBOV in individuals recently vaccinated with rVSV-  
146 ZEBOV. To assess the potential contraindication of subsequent mAb treatment, we treated a cohort  
147 of vaccinated animals with the MIL77 mAb cocktail at days 3, 6, and 9 dpi. Surprisingly, instead  
148 of interference, we observed clear therapeutic benefit, where animals vaccinated before EBOV  
149 challenge and then subsequently treated postexposure were afforded complete protection without  
150 any observable clinical disease. In contrast, animals that received vaccination only or mAb  
151 treatment only displayed significant signs of clinical EVD, and in the case of the vaccine only  
152 group, limited protection.

153           It has recently been demonstrated that induction of potent innate immune effector  
154 mechanisms occurs in the context of rVSV-ZEBOV vaccination<sup>22</sup>. Indeed, others have shown  
155 modest widening of the therapeutic window upon administration of exogenous interferon-alpha  
156 modalities, although neither approach was enough to induce protection<sup>23,24</sup>. While the precise  
157 mechanism is unclear, the scenario presented here suggests reduction of circulating infectious  
158 EBOV complements the induction of vaccine-induced EBOV immunity, ultimately reducing  
159 morbidity and likely contributing to survival. Of note, a precedent for a tandem approach of  
160 vaccination and mAb treatment for postexposure treatment is the standard protocol for rabies virus  
161 exposure, which recommends both vaccination with the inactivated rabies virus vaccine and  
162 treatment with human rabies immunoglobulin<sup>25</sup>. Our study suggests that a similar approach to  
163 treatment may be appropriate for high-risk EBOV exposure and that mAb therapy post-vaccination  
164 may improve clinical outcome in recently vaccinated individuals.

165

## 166 **Methods**

167 *Challenge virus.* *Zaire ebolavirus* (EBOV) isolate 199510621 (strain Kikwit) originated from a  
168 65-year-old female patient who had died on 5 May 1995. The study challenge material was from  
169 the second Vero E6 passage of EBOV isolate 199510621. Briefly, the first passage at UTMB  
170 consisted of inoculating CDC 807223 (passage 1 of EBOV isolate 199510621) at a MOI of 0.001  
171 onto Vero E6 cells. The cell culture fluids were subsequently harvested at day 10 post infection  
172 and stored at -80°C as ~1 ml aliquots. Deep sequencing indicated the EBOV was greater than 98%  
173 7U (consecutive stretch of 7 uridines). No detectable mycoplasma or endotoxin levels were  
174 measured (< 0.5 endotoxin units (EU)/ml).

175



176 *Nonhuman primate vaccination, challenge, and treatment.* Sixteen healthy, filovirus-naive, adult  
177 (~ 3.7 to 5.4 kg) Chinese origin rhesus macaques (*Macaca mulatta*; PreLabs) were randomized  
178 into three groups of five experimental animals each and a control group of one animal. Animals in  
179 two of the experimental animals were vaccinated by intramuscular (i.m.) injection of  $\sim 2 \times 10^7$   
180 PFU of the rVSV-ZEBOV GP vaccine based on the Mayinga strain<sup>26</sup>; this is the same dose used  
181 for humans<sup>1</sup>. Animals in the remaining experimental group as well as the control animal were not  
182 vaccinated. All 16 of the macaques were challenged one day after vaccination of the experimental  
183 groups by i.m. injection with a target dose of 1,000 PFU of EBOV strain Kikwit. Experimental  
184 animals in one of the vaccinated groups (rVSV-ZEBOV + MIL77) and one of the unvaccinated  
185 groups (MIL77 only) were treated by intravenous (i.v.) administration of  $\sim 20$  mg/kg of MIL77 on  
186 days 3, 6, and 9 after EBOV challenge while animals in the experimental unvaccinated group  
187 (rVSV-ZEBOV only) and the control animal were not treated. All 16 animals were given physical  
188 examinations, and blood was collected before vaccination (day -1), before virus challenge (day 0),  
189 and on days 1, 3, 6, 9, 14, 21, and 28 (study endpoint) after virus challenge. The macaques were  
190 monitored daily and scored for disease progression with an internal EBOV humane endpoint  
191 scoring sheet approved by the UTMB IACUC. UTMB facilities used in this work are accredited  
192 by the Association for Assessment and Accreditation of Laboratory Animal Care International and  
193 adhere to principles specified in the eighth edition of the Guide for the Care and Use of Laboratory  
194 Animals, National Research Council. The scoring changes measured from baseline included  
195 posture and activity level, attitude and behavior, food intake, respiration, and disease manifes-  
196 tations, such as visible rash, hemorrhage, ecchymosis, or flushed skin. A score of  $\geq 9$  indicated  
197 that an animal met the criteria for euthanasia.

198

199 *Detection of viremia.* RNA was isolated from whole blood utilizing the Viral RNA mini-kit  
200 (Qiagen) using 100 µl of blood added to 600 µl of the viral lysis buffer. Primers and probe targeting  
201 the VP30 gene of EBOV were used for real-time quantitative PCR (RT-qPCR) with the following  
202 probes: EBOV, 6-carboxyfluorescein (FAM)-5' CCG TCA ATC AAG GAG CGC CTC 3'-6  
203 carboxytetramethylrhodamine (TAMRA) (Life Technologies). Viral RNA was detected using the  
204 CFX96 detection system (Bio-Rad Laboratories, Hercules, CA) in one-step probe RT-qPCR kits  
205 (Qiagen) with the following cycle conditions: 50°C for 10 min, 95°C for 10 s, and 40 cycles of  
206 95°C for 10 s and 57°C for 30 s. Threshold cycle (CT) values representing viral genomes were  
207 analyzed with CFX Manager software, and the data are shown as genome equivalents (GEq) per  
208 milliliter. To create the GEq standard, RNA from viral stocks was extracted, and the number of  
209 strain-specific genomes was calculated using Avogadro's number and the molecular weight of  
210 each viral genome.

211 Virus titration was performed for rVSV-ZEBOV and for EBOV by plaque assay with Vero  
212 E6 cells from all plasma samples as previously described<sup>26</sup>. Briefly, increasing 10-fold dilutions  
213 of the samples were adsorbed to Vero E6 monolayers in duplicate wells (200 µL); the limit of  
214 detection was 25 PFU/mL.

215

216 *Hematology and serum biochemistry.* Total white blood cell counts, white blood cell differentials,  
217 red blood cell counts, platelet counts, hematocrit values, total hemoglobin concentrations, mean  
218 cell volumes, mean corpuscular volumes, and mean corpuscular hemoglobin concentrations were  
219 analyzed from blood collected in tubes containing EDTA using a laser-based hematologic analyzer  
220 (Beckman Coulter). Serum samples were tested for concentrations of alanine aminotransferase

221 (ALT), albumin, alkaline phosphatase (ALP), amylase, aspartate aminotransferase (AST), C-  
222 reactive protein (CRP), calcium, creatinine, gammaglutamyltransferase (GGT), glucose, total  
223 protein, blood urea nitrogen (BUN), and uric acid, and by using a Piccolo point-of-care analyzer  
224 and Biochemistry Panel Plus analyzer discs (Abaxis).

225

226 *Histopathology and immunohistochemistry.* A partial necropsy was performed on all subjects.

227 Tissue samples of major organs were collected for histopathologic and immunohistochemical  
228 examination, immersion-fixed in 10% neutral buffered formalin, and processed for

229 histopathology as previously described<sup>27,28</sup>. For immunohistochemistry, specific anti-ZEBOV

230 immunoreactivity was detected using an anti-ZEBOV VP40 primary antibody (IBT) at a 1:4000

231 dilution for 60 minutes. The tissues were processed for immunohistochemistry using the Thermo

232 Autostainer 360 (ThermoFisher, Kalamazoo, MI). Secondary used was biotinylated goat anti-

233 rabbit IgG (Vector Labs, Burlingame, CA #BA-1000) at 1:200 for 30 minutes followed by

234 Vector Horseradish Peroxidase Streptavidin, R.T.U (Vector) for 30 min. Slides were developed

235 with Dako DAB chromagen(Dako, Carpinteria, CA #K3468) for 5 minutes and counterstained

236 with Harris Hematoxylin for 30 seconds. Non-immune rabbit IgG was used as a negative control.

237

238 *Detection of total IgM and IgG responses to Ebola VP40 and GP.* ELISA plates were coated

239 overnight at 4°C with 0.1 µg/mL of EBOV GP-TM (Integrated Biotherapeutics) or recombinant

240 VP40 antigen coated plates (Zalgen) were used both of which were blocked for 2 hours prior to

241 use. Serum samples were assayed using a 1:100 dilution in ELISA diluent (1% heat-inactivated

242 fetal bovine serum, 1× phosphate-buffered saline, and 0.2% Tween-20). Samples were incubated

243 for 1 hour at ambient temperature and then removed, and plates were washed. Wells then were

244 incubated for 1 hour with goat anti-NHP IgM or IgG conjugated to horseradish peroxidase  
245 (Fitzgerald Industries International) at a 1:5000 dilution. Wells were washed and then incubated  
246 with tetramethylbenzidine substrate (KPL) (100 uL/well) and incubated for 10 minutes followed  
247 by stop solution (100 uL/well). Microplates are read at 450 nm with 650 nm subtraction with an  
248 OD<sub>450 nm</sub> cut-off of 0.069.

249  
250  
251 *Detection of Circulating MIL77 antibody.* ELISA plates were coated overnight at 4°C with 0.1  
252 µg/mL of mouse anti-human IgG (human CH2 domain with no cross-reactivity to rhesus macaque  
253 IgG; clone R10Z8E9; BioRad) and then blocked for 2 hours. The serum samples were assayed at  
254 4-fold dilutions starting at a 1:100 dilution in ELISA diluent (1% heat-inactivated fetal bovine  
255 serum, 1× phosphate-buffered saline, and 0.2% Tween-20). Samples were incubated for 1 hour at  
256 ambient temperature and then removed, and plates were washed. Wells then were incubated for 1  
257 hour with goat anti-human IgG conjugated to horseradish peroxidase (Fitzgerald Industries  
258 International) at a 1:20,000 dilution. Wells were washed and then incubated with  
259 tetramethylbenzidine substrate (KPL) (100 uL/well) and incubated for 10 minutes followed by stop  
260 solution (100 uL/well). Microplates are read at 450 nm with 650 nm subtraction with an OD<sub>450 nm</sub>  
261 cut-off of 0.071 (Biotek Cytation system). mAb were quantified using Prism software, version 7.04  
262 (GraphPad), to analyze sigmoidal dose-response (variable slope), using MIL77 as standard.

263

264 *Statistical analysis.*

265 Specific statistical tests are noted in the text and/or figure legends. All statistical analysis was  
266 performed in Graphpad 8.2.1.

267

268 *Study approval.* The animal studies were performed at the Galveston National Laboratory,  
269 University of Texas Medical Branch at Galveston and were approved by the University of Texas  
270 Medical Branch Institutional Animal Care and Use Committee.

271

272 *Availability of data and materials.* The datasets used and/or analyzed during the current study are  
273 available from the corresponding author on reasonable request.

274

## 275 **Acknowledgments**

276 The authors would like to thank the UTMB Animal Resource Center for husbandry support of  
277 laboratory animals, Dr. Chad Mire for assistance with the animal studies, and Natalie Dobias for  
278 expert histology and immunohistochemistry support. We also thank Drs. Luis Branco and Matt  
279 Boisen of Zalgen for generously providing EBOV VP40 antigen coated plates for the ELISA work.  
280 We also thank Dr. Tina Parker for helpful discussions. This study was supported by the Department  
281 of Health and Human Services, National Institutes of Health grants U19AI109711 and  
282 U19AI142785 to T.W.G. and UC7AI094660 for BSL-4 operations support of the Galveston  
283 National Laboratory. Partial funding was provided through the Intramural research program,

284 NIAID/NIH to H.F. Opinions, interpretations, conclusions, and recommendations are those of the  
285 authors and are not necessarily endorsed by the University of Texas Medical Branch or the  
286 National Institutes of Health.

287

### 288 **Author contributions**

289 Z.A.B., A.S., L.Z., H.F., and T.W.G. conceived and designed the study. J.B.G., R.W.C., D.J.D.,  
290 and T.W.G. performed the NHP vaccination, infection, and treatment experiments and conducted  
291 clinical observations of the animals. V.B. and K.N.A. performed the clinical pathology assays.  
292 J.B.G. and V.B. performed the EBOV infectivity assays. K.N.A. performed the PCR assays.  
293 R.W.C. and K.M. performed the ELISA assays. A.N.P., Z.A.B., J.B.G., R.W.C., V.B., K.N.A.,  
294 D.J.D., K.M., K.A.F., A.S., L.Z., H.F., and T.W.G. analyzed the data. K.A.F. performed  
295 histological and immunohistochemical analysis of the data. A.N.P., R.W.C, K.A.F., and T.W.G.  
296 wrote the paper. Z.A.B., A.S., L.Z., and H.F. edited the paper. All authors had access to all of the  
297 data and approved the final version of the manuscript.

298

### 299 **Competing interests**

300 Z.A.B. and L.Z. are employees of Mapp Biopharmaceutical. H.F. and T.W.G. are listed on  
301 patents related to Ebola vaccines.

## 302 References

- 303 1 Henao-Restrepo, A. M. *et al.* Efficacy and effectiveness of an rVSV-vectored vaccine in  
304 preventing Ebola virus disease: final results from the Guinea ring vaccination, open-label,  
305 cluster-randomised trial (Ebola Ca Suffit!). *Lancet* **389**, 505-518, doi:10.1016/S0140-  
306 6736(16)32621-6 (2017).
- 307 2 Corti, D. *et al.* Protective monotherapy against lethal Ebola virus infection by a potently  
308 neutralizing antibody. *Science* **351**, 1339-1342, doi:10.1126/science.aad5224 (2016).
- 309 3 Lucey, D. R. New treatments for Ebola virus disease. *BMJ* **366**, l5371, doi:10.1136/bmj.l5371  
310 (2019).
- 311 4 Pascal, K. E. *et al.* Development of Clinical-Stage Human Monoclonal Antibodies That Treat  
312 Advanced Ebola Virus Disease in Nonhuman Primates. *J Infect Dis* **218**, S612-S626,  
313 doi:10.1093/infdis/jiy285 (2018).
- 314 5 Qiu, X. *et al.* Two-mAb cocktail protects macaques against the Makona variant of Ebola virus. *Sci*  
315 *Transl Med* **8**, 329ra333, doi:10.1126/scitranslmed.aad9875 (2016).
- 316 6 Qiu, X. *et al.* Reversion of advanced Ebola virus disease in nonhuman primates with ZMapp.  
317 *Nature* **514**, 47-53, doi:10.1038/nature13777 (2014).
- 318 7 Reynolds, P. & Marzi, A. Ebola and Marburg virus vaccines. *Virus Genes* **53**, 501-515,  
319 doi:10.1007/s11262-017-1455-x (2017).
- 320 8 Cross, R. W., Mire, C. E., Feldmann, H. & Geisbert, T. W. Post-exposure treatments for Ebola and  
321 Marburg virus infections. *Nat. Rev. Drug Discov.* **17**, 413-434, doi:10.1038/nrd.2017.251 (2018).
- 322 9 Bornholdt, Z. A. *et al.* A Two-Antibody Pan-Ebolavirus Cocktail Confers Broad Therapeutic  
323 Protection in Ferrets and Nonhuman Primates. *Cell Host Microbe* **25**, 49-58 e45,  
324 doi:10.1016/j.chom.2018.12.005 (2019).
- 325 10 World Health Organization. Preliminary results on the efficacy of rVSV-ZEBOV-GP Ebola vaccine  
326 using the ring vaccination strategy in the control of an Ebola outbreak in the Democratic  
327 Republic of the Congo: an example of integration of research into epidemic response. **2019**  
328 (2019). <[https://www.who.int/csr/resources/publications/ebola/ebola-ring-vaccination-results-  
329 12-april-2019.pdf](https://www.who.int/csr/resources/publications/ebola/ebola-ring-vaccination-results-12-april-2019.pdf)>.
- 330 11 U.S. Food and Drug Administration. First FDA-approved vaccine for the prevention of Ebola virus  
331 disease, marking a critical milestone in public health preparedness and response,  
332 <[https://www.fda.gov/news-events/press-announcements/first-fda-approved-vaccine-  
333 prevention-ebola-virus-disease-marking-critical-milestone-public-health](https://www.fda.gov/news-events/press-announcements/first-fda-approved-vaccine-prevention-ebola-virus-disease-marking-critical-milestone-public-health)> (2019).
- 334 12 Jones, S. M. *et al.* Live attenuated recombinant vaccine protects nonhuman primates against  
335 Ebola and Marburg viruses. *Nat Med* **11**, 786-790, doi:10.1038/nm1258 (2005).
- 336 13 Geisbert, T. W. *et al.* Vesicular stomatitis virus-based ebola vaccine is well-tolerated and  
337 protects immunocompromised nonhuman primates. *PLoS Pathog* **4**, e1000225,  
338 doi:10.1371/journal.ppat.1000225 (2008).
- 339 14 de Wit, E. *et al.* Safety of recombinant VSV-Ebola virus vaccine vector in pigs. *Emerg Infect Dis*  
340 **21**, 702-704, doi:10.3201/eid2104.142012 (2015).
- 341 15 Geisbert, T. W. *et al.* Recombinant adenovirus serotype 26 (Ad26) and Ad35 vaccine vectors  
342 bypass immunity to Ad5 and protect nonhuman primates against ebolavirus challenge. *J. Virol.*  
343 **85**, 4222-4233, doi:10.1128/JVI.02407-10 (2011).
- 344 16 Geisbert, T. W. *et al.* Pathogenesis of Ebola hemorrhagic fever in cynomolgus macaques:  
345 evidence that dendritic cells are early and sustained targets of infection. *Am J Pathol* **163**, 2347-  
346 2370, doi:10.1016/S0002-9440(10)63591-2 (2003).

- 347 17 Twenhafel, N. A. *et al.* Pathology of experimental aerosol Zaire ebolavirus infection in rhesus  
348 macaques. *Vet Pathol* **50**, 514-529, doi:10.1177/0300985812469636 (2013).
- 349 18 Feldmann, H. *et al.* Effective post-exposure treatment of Ebola infection. *PLoS Pathog* **3**, e2,  
350 doi:10.1371/journal.ppat.0030002 (2007).
- 351 19 Marzi, A. *et al.* Efficacy of Vesicular Stomatitis Virus-Ebola Virus Postexposure Treatment in  
352 Rhesus Macaques Infected With Ebola Virus Makona. *J Infect Dis* **214**, S360-S366,  
353 doi:10.1093/infdis/jiw218 (2016).
- 354 20 Marzi, A. *et al.* VSV-EBOV rapidly protects macaques against infection with the 2014/15 Ebola  
355 virus outbreak strain. *Science* **349**, 739-742, doi:10.1126/science.aab3920 (2015).
- 356 21 ElSherif, M. S. *et al.* Assessing the safety and immunogenicity of recombinant vesicular  
357 stomatitis virus Ebola vaccine in healthy adults: a randomized clinical trial. *CMAJ* **189**, E819-  
358 E827, doi:10.1503/cmaj.170074 (2017).
- 359 22 Menicucci, A. R., Jankeel, A., Feldmann, H., Marzi, A. & Messaoudi, I. Antiviral Innate Responses  
360 Induced by VSV-EBOV Vaccination Contribute to Rapid Protection. *MBio* **10**,  
361 doi:10.1128/mBio.00597-19 (2019).
- 362 23 Jahrling, P. B. *et al.* Evaluation of Immune Globulin and Recombinant Interferon- $\alpha$ 2b for  
363 Treatment of Experimental Ebola Virus Infections. *The Journal of Infectious Diseases* **179**, S224-  
364 S234, doi:10.1086/514310 (1999).
- 365 24 Qiu, X. *et al.* mAbs and Ad-Vectored IFN- $\alpha$  Therapy Rescue Ebola-Infected Nonhuman Primates  
366 When Administered After the Detection of Viremia and Symptoms. *Sci. Transl. Med.* **5**,  
367 207ra143-207ra143, doi:10.1126/scitranslmed.3006605 (2013).
- 368 25 World Health Organization. Rabies vaccines and immunoglobulins: WHO position April 2018.  
369 (2018).  
370 <[https://www.who.int/immunization/policy/position\\_papers/pp\\_rabies\\_summary\\_2018.pdf?ua](https://www.who.int/immunization/policy/position_papers/pp_rabies_summary_2018.pdf?ua=1)  
371 [=1](https://www.who.int/immunization/policy/position_papers/pp_rabies_summary_2018.pdf?ua=1)>.
- 372 26 Jones, S. M. *et al.* Live attenuated recombinant vaccine protects nonhuman primates against  
373 Ebola and Marburg viruses. *Nat. Med.* **11**, 786-790, doi:10.1038/nm1258 (2005).
- 374 27 Mire, C. E. *et al.* Single-dose attenuated Vesiculovax vaccines protect primates against Ebola  
375 Makona virus. *Nature*, doi:10.1038/nature14428 (2015).
- 376 28 Thi, E. P. *et al.* Lipid nanoparticle siRNA treatment of Ebola-virus-Makona-infected nonhuman  
377 primates. *Nature* **521**, 362-365, doi:10.1038/nature14442 (2015).

378

379



380 **Figure Legends**

381 **Figure 1: Survival and Clinical Score Outcomes:** Animals were vaccinated/treated with rVSV-  
382 ZEBOV and/or MIL77 at the indicated day pre/post-infection. n=5 for all groups except  
383 experimental control (n=1). Historical control rhesus macaques infected with EBOV-Kikwit were  
384 included for statistical comparisons (n=12). Significance was measured using the Log-rank  
385 (Mantel-Cox) test. Colored asterisks denote statistical significance to the same colored group.  
386 p=0.0253 for rVSV-ZEBOV + MIL77 vs. experimental control cohort; p= 0.0486 for rVSV-  
387 ZEBOV + MIL77 vs. rVSV-ZEBOV cohort; p= 0.0003 for rVSV-ZEBOV + MIL77 vs. Historical  
388 Control cohort; p= 0.0072 for rVSV-ZEBOV vs. Historical Control cohort; p= 0.0009 for MIL77  
389 vs. Historical Control cohort; all other comparisons were statistically insignificant. Arrows denote  
390 color-coded cohort. Asterisk indicates day of challenge (day 0). **(B-D)** Clinical illness scores for  
391 rVSV-ZEBOV + MIL77 **(B)**, rVSV-ZEBOV **(C)**, and MIL77 **(D)** treated rhesus macaques. For  
392 each panel, dashed lines indicate temperature (left y-axis) and solid lines indicate clinical score  
393 (right y-axis). Significance is graphically tiered as following: \* =  $\leq 0.05$ , \*\* =  $\leq 0.005$ , and \*\*\*  
394 =  $\leq 0.0005$ .

395

396 **Figure 2: Circulating infectious virus and vRNA:** Plasma viremia and vRNA content in whole  
397 blood of rVSV-ZEBOV + MIL77 (A. & B.), rVSV-ZEBOV (C. & D.), and MIL77 (E & F.). Limit  
398 of detection for infectious virus assays was 25 pfu/ml.

399

400 **Figure 3: Hematoxylin/eosin and immunohistochemical staining of tissues from EBOV**  
401 **challenged rhesus macaques.** Representative H&E-stained tissue specimens

402 (A,B,C,D,I,J,K,L,Q,R,S,T) and IHC antibody labeled tissue specimens  
403 (E,F,G,H,M,N,O,P,U,V,W,X). ING LN=inguinal lymph node. For IHC images, EBOV antigen  
404 staining (VP40 protein), if present, is shown in brown. For the rVSV-EBOV + MIL77 cohort,  
405 images were collected from subject #VSV/mAb-2, and are representative of all animals in the  
406 cohort. For the rVSV-EBOV cohort, images were collected from subject #VSV-1, and are  
407 representative of all animals in the cohort surviving challenge. For the MIL77 cohort, images were  
408 collected from subject #mAb-4, and are representative of all animals in the cohort surviving  
409 challenge. Images from a historical control animal, subject #H-7, are representative of what was  
410 observed in the other historical controls and the control animal for this study. Animals from the  
411 rVSV-EBOV and MIL77 only cohorts which succumbed to disease exhibited histological lesions  
412 and antigen labeling comparable to control animals. All images were captured at 20X  
413 magnification.

414

415 **Figure 4: Circulating host and therapeutic antibodies in EBOV challenged and treated**  
416 **rhesus macaques.** Circulating anti-GP IgM from rVSV-EBOV + MIL77 (A.), rVSV-EBOV (B.),  
417 and MIL77 (C.) groups. Circulating anti-VP40 IgM from rVSV-EBOV + MIL77 (D.), rVSV-  
418 EBOV (E.), and MIL77 (F.) groups. Circulating anti-VP40 IgG from rVSV-EBOV + MIL77 (G.),  
419 rVSV-EBOV (H.), and MIL77 (I.) groups. ELISA data are represented as mean technical  
420 replicates (n=2) where change in absorbances at 450nm from subtracted from baseline at day -1  
421 (A-I.). Circulating MIL77 concentrations for the rVSV-EBOV + MIL77 and MIL77 groups are  
422 represented over time (J.). Significance of concentration differences between rVSV-EBOV +  
423 MIL77 and MIL77 only groups ( $P \leq 0.001 = ***$ ) were determined with two tailed t-tests using  
424 Holm-Sidak correction for multiple comparisons.

425

426 **Supplementary Figure 1: Historical control rhesus macaques infected with EBOV-Kikwit:**

427 A. Infectious virus in circulation. Limit of detection is 25 pfu/ml. B. vRNA content in whole  
428 blood.

429

430 **Supplementary Table 1. Clinical description and outcome of rVSV-EBOV-GP**

431 **vaccinated/MIL77 treated and control rhesus macaques following EBOV challenge:** Days

432 after EBOV challenge are in parentheses. Lymphopenia, granulopenia, monocytopenia, and

433 thrombocytopenia are defined by a  $\geq 35\%$  drop in numbers of lymphocytes, granulocytes,

434 monocytes, and platelets, respectively. Leukocytosis, monocytosis, and granulocytosis are defined

435 by a two-fold or greater increase in numbers of white blood cells over base line. Fever is defined

436 as a temperature more than 2.5 °F over baseline, or at least 1.5 °F over baseline and  $\geq 103.5$  °F.

437 Hypothermia is defined as a temperature  $\leq 3.5$ °F below baseline. Hyperglycemia is defined as a

438 two-fold or greater increase in levels of glucose. Hypoglycemia is defined by a  $\geq 25\%$  decrease in

439 levels of glucose. Hypoalbuminemia is defined by a  $\geq 25\%$  decrease in levels of albumin.

440 Hypoproteinemia is defined by a  $\geq 25\%$  decrease in levels of total protein. Hypoamylasemia is

441 defined by a  $\geq 25\%$  decrease in levels of serum amylase. Hypocalcemia is defined by a  $\geq 25\%$

442 decrease in levels of serum calcium. (ALT) alanine aminotransferase, (AST) aspartate

443 aminotransferase, (ALP) alkaline phosphatase, (CRE) Creatinine, (CRP) C-reactive protein, (Hct)

444 hematocrit, (Hgb) hemoglobin

445

446 **Supplementary Table 2. Clinical description and outcome of rVSV-EBOV-GP vaccinated**  
447 **rhesus macaques following EBOV challenge:** Days after EBOV challenge are in parentheses.  
448 Lymphopenia, granulopenia, monocytopenia, and thrombocytopenia are defined by a  $\geq 35\%$  drop  
449 in numbers of lymphocytes, granulocytes, monocytes, and platelets, respectively. Leukocytosis,  
450 monocytosis, and granulocytosis are defined by a two-fold or greater increase in numbers of white  
451 blood cells over base line. Fever is defined as a temperature more than 2.5 °F over baseline, or at  
452 least 1.5 °F over baseline and  $\geq 103.5$  °F. Hypothermia is defined as a temperature  $\leq 3.5$ °F below  
453 baseline. Hyperglycemia is defined as a two-fold or greater increase in levels of glucose.  
454 Hypoglycemia is defined by a  $\geq 25\%$  decrease in levels of glucose. Hypoalbuminemia is defined  
455 by a  $\geq 25\%$  decrease in levels of albumin. Hypoproteinemia is defined by a  $\geq 25\%$  decrease in  
456 levels of total protein. Hypoamylasemia is defined by a  $\geq 25\%$  decrease in levels of serum amylase.  
457 Hypocalcemia is defined by a  $\geq 25\%$  decrease in levels of serum calcium. (ALT) alanine  
458 aminotransferase, (AST) aspartate aminotransferase, (ALP) alkaline phosphatase, (CRE)  
459 Creatinine, (CRP) C-reactive protein, (Hct) hematocrit, (Hgb) hemoglobin

460

461 **Supplementary Table 3. Clinical description and outcome of MIL77 treated rhesus**  
462 **macaques following EBOV challenge:** Days after EBOV challenge are in parentheses.  
463 Lymphopenia, granulopenia, monocytopenia, and thrombocytopenia are defined by a  $\geq 35\%$  drop  
464 in numbers of lymphocytes, granulocytes, monocytes, and platelets, respectively. Leukocytosis,  
465 monocytosis, and granulocytosis are defined by a two-fold or greater increase in numbers of white  
466 blood cells over base line. Fever is defined as a temperature more than 2.5 °F over baseline, or at  
467 least 1.5 °F over baseline and  $\geq 103.5$  °F. Hypothermia is defined as a temperature  $\leq 3.5$ °F below  
468 baseline. Hyperglycemia is defined as a two-fold or greater increase in levels of glucose.

469 Hypoglycemia is defined by a  $\geq 25\%$  decrease in levels of glucose. Hypoalbuminemia is defined  
470 by a  $\geq 25\%$  decrease in levels of albumin. Hypoproteinemia is defined by a  $\geq 25\%$  decrease in  
471 levels of total protein. Hypoamylasemia is defined by a  $\geq 25\%$  decrease in levels of serum amylase.  
472 Hypocalcemia is defined by a  $\geq 25\%$  decrease in levels of serum calcium. (ALT) alanine  
473 aminotransferase, (AST) aspartate aminotransferase, (ALP) alkaline phosphatase, (CRE)  
474 Creatinine, (CRP) C-reactive protein, (Hct) hematocrit, (Hgb) hemoglobin.

475

476

477

478

479

480

481

482

483

484

485

486

487

**A.**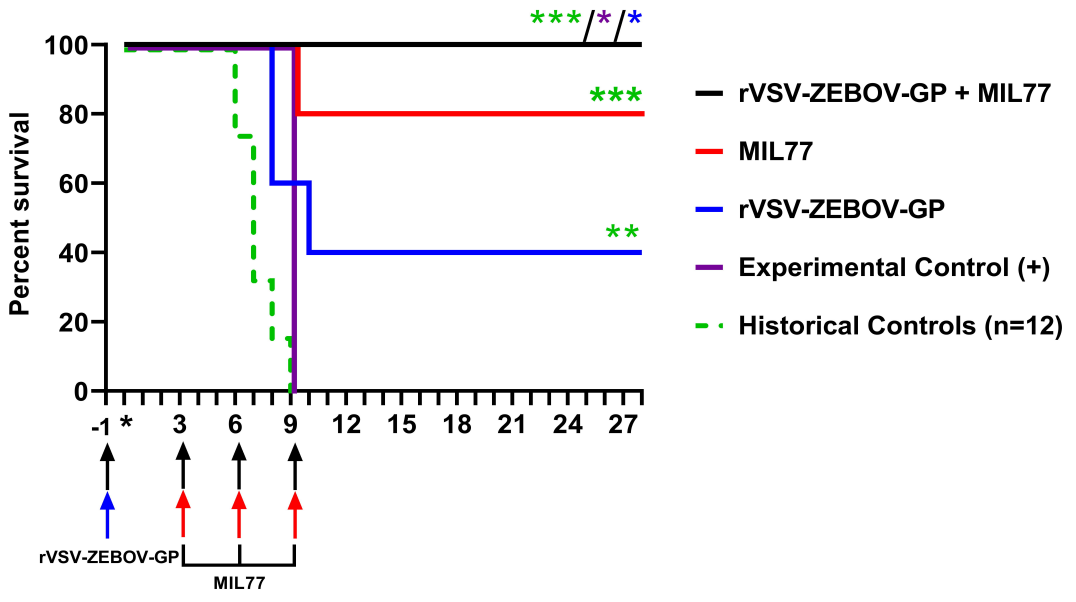**B.**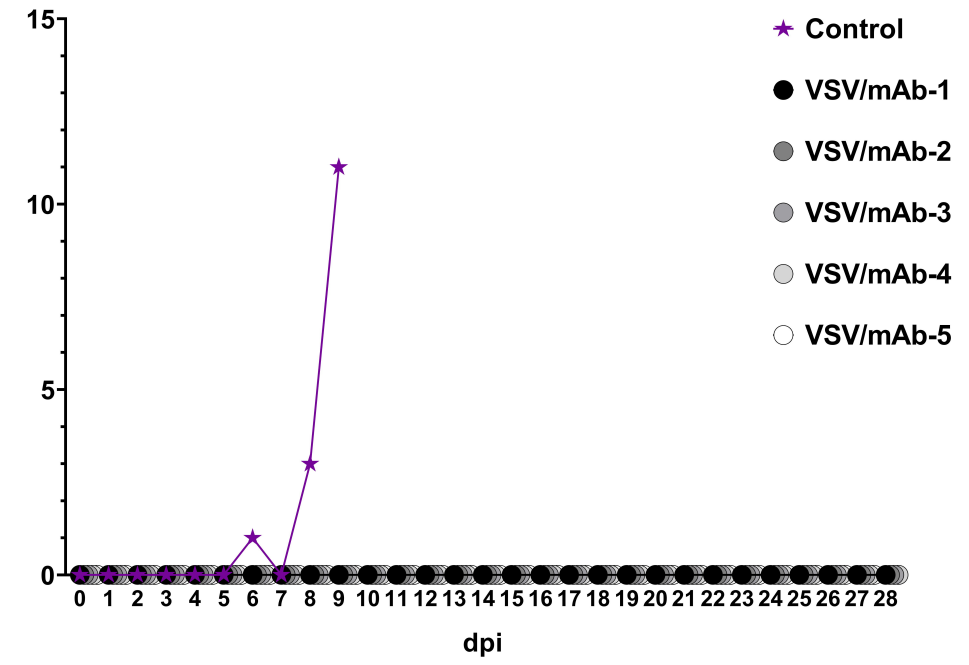**C.**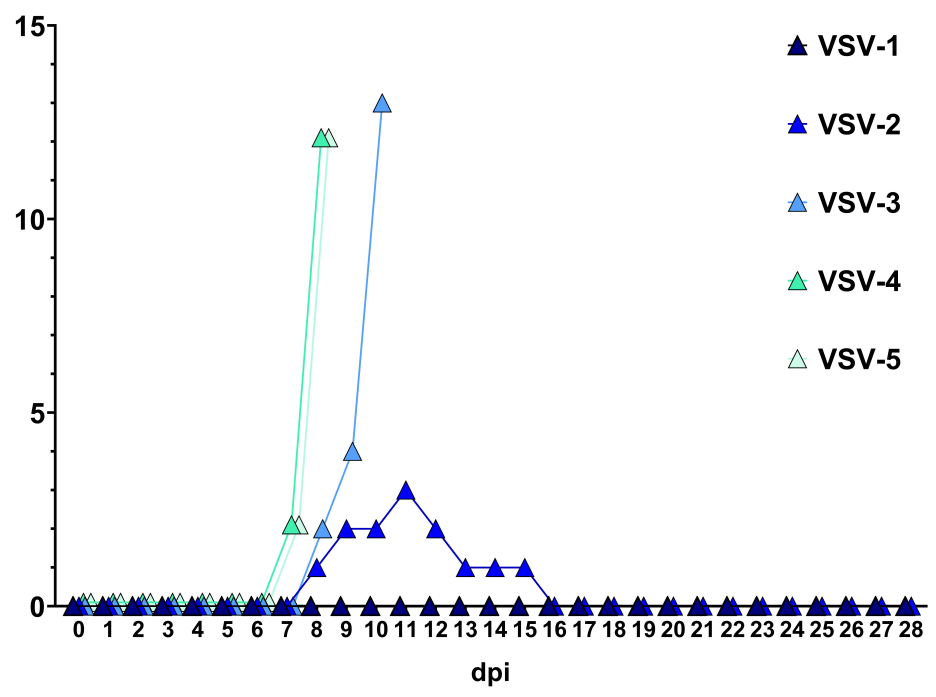**D.**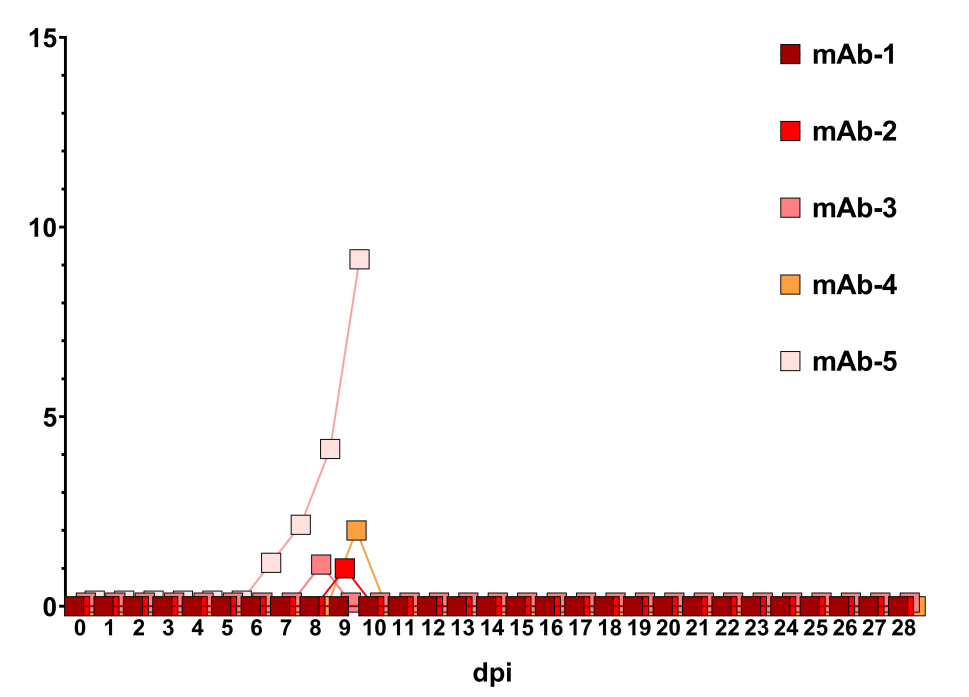

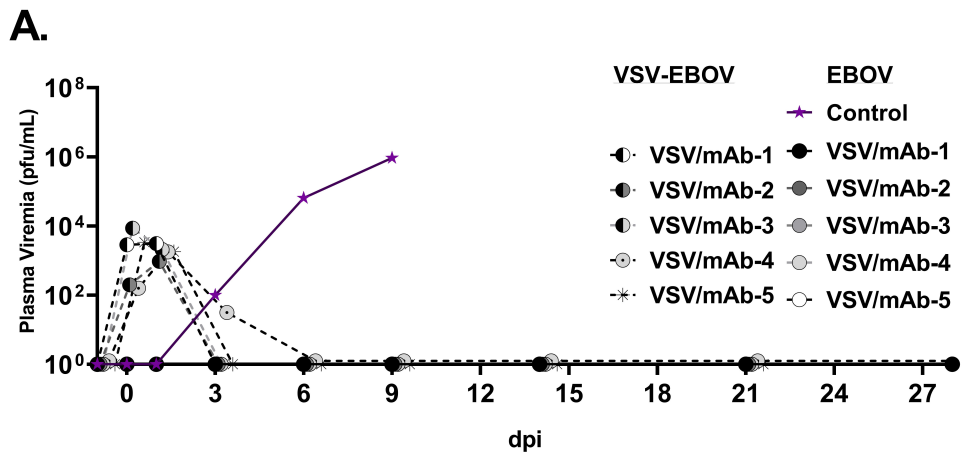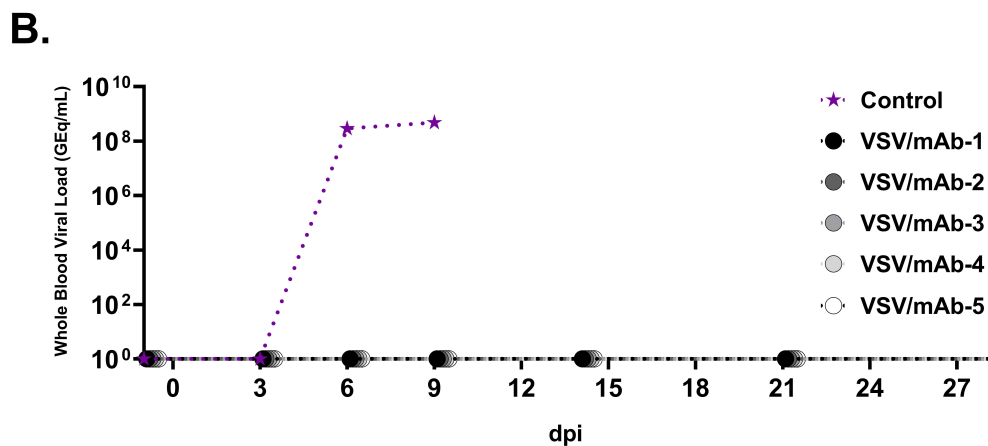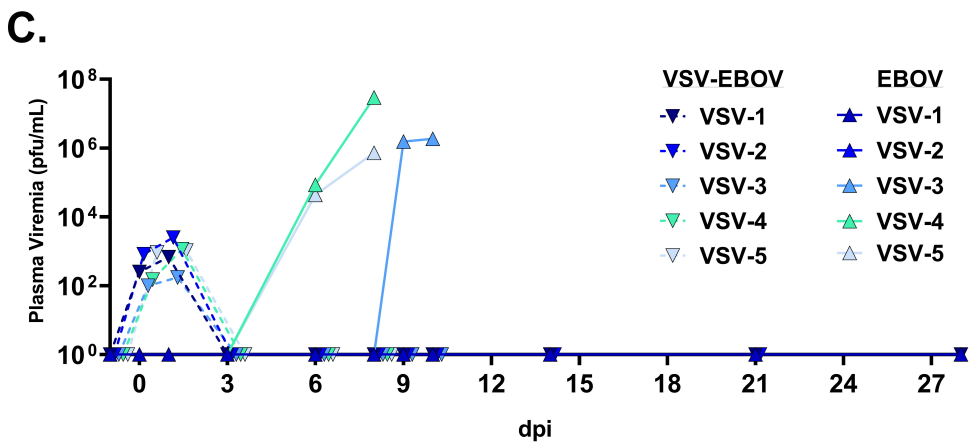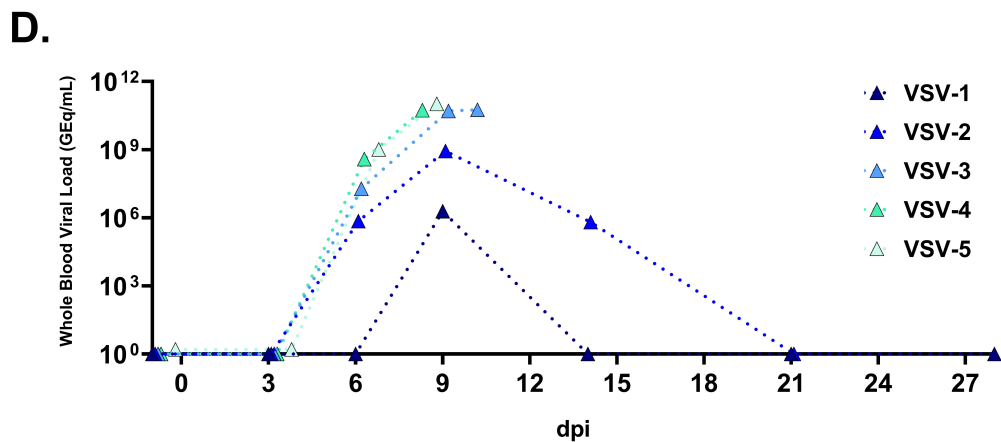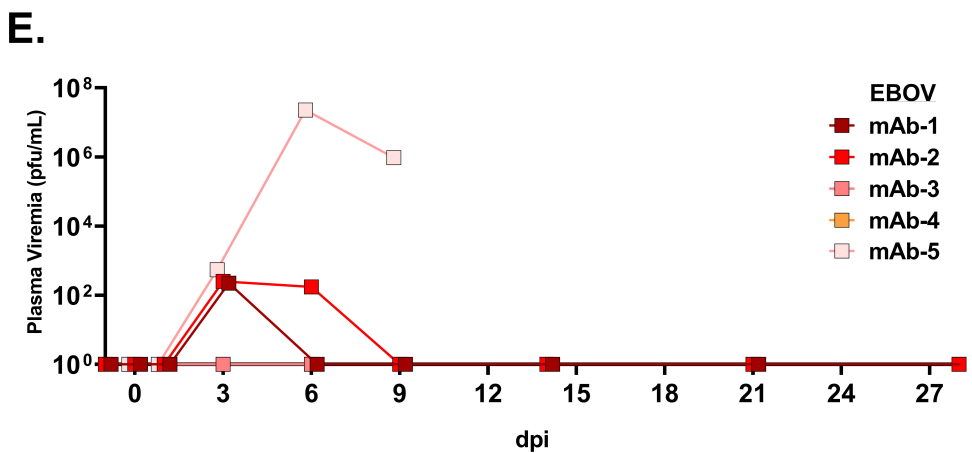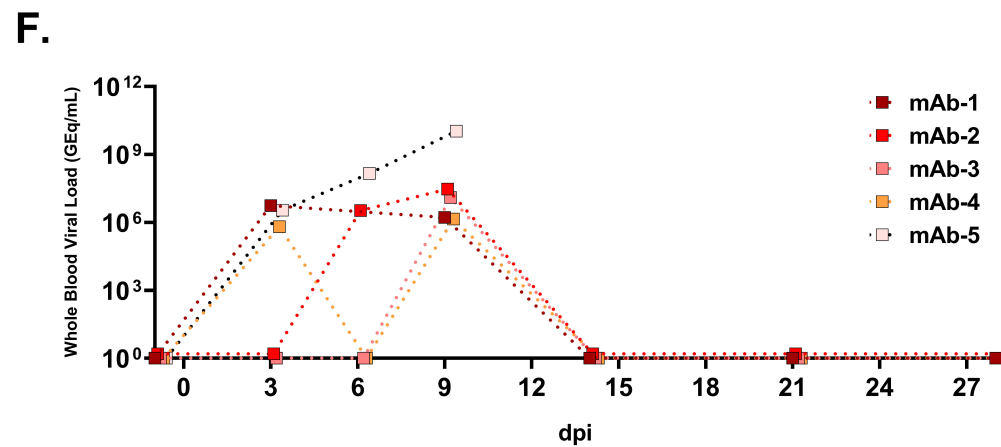

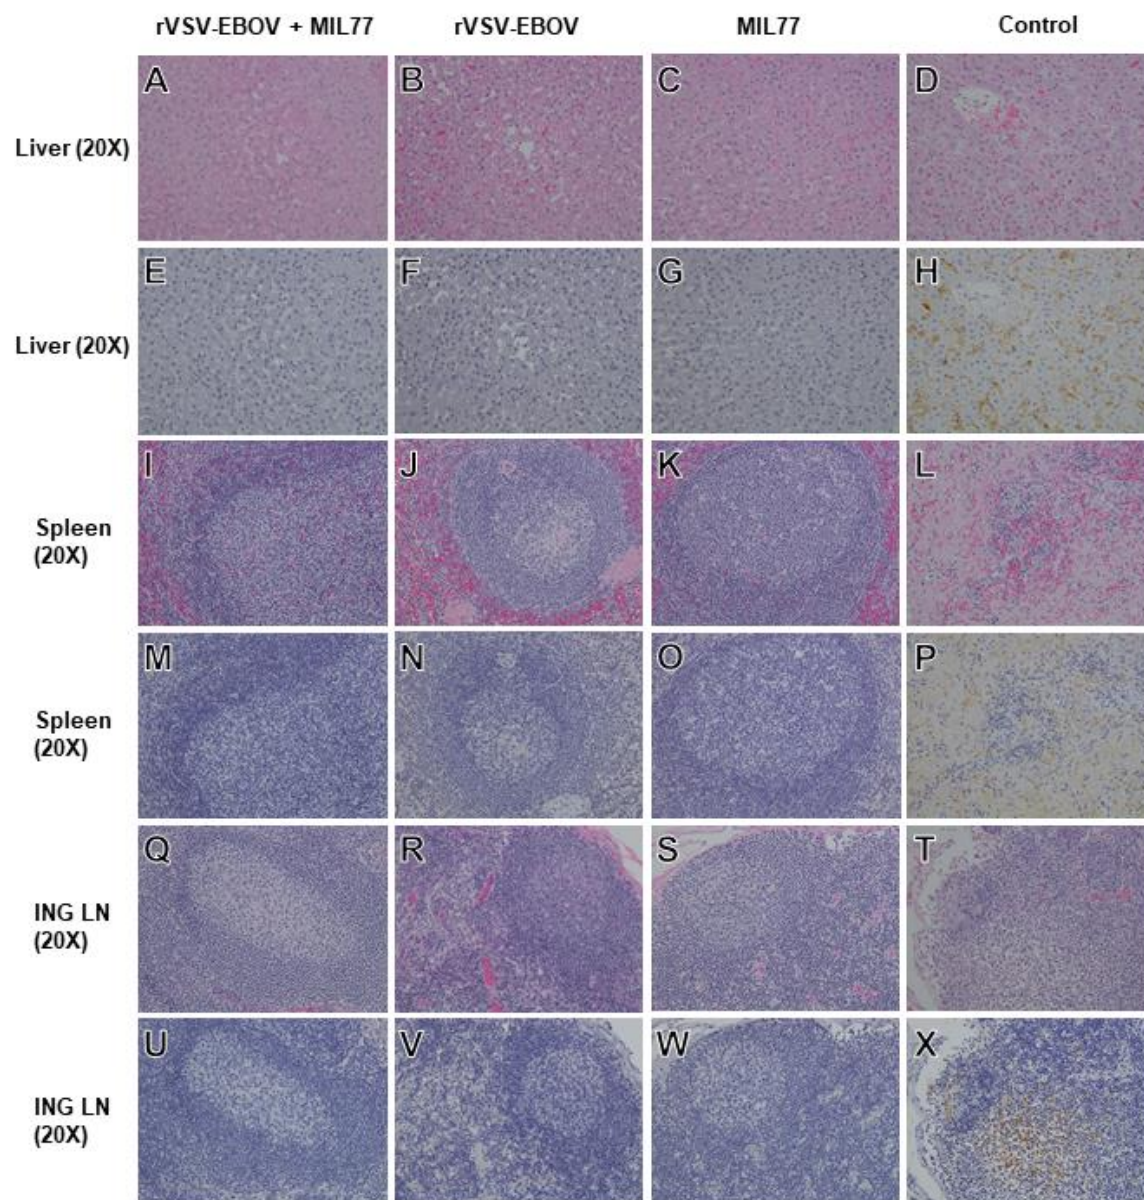



# ANTI-GP

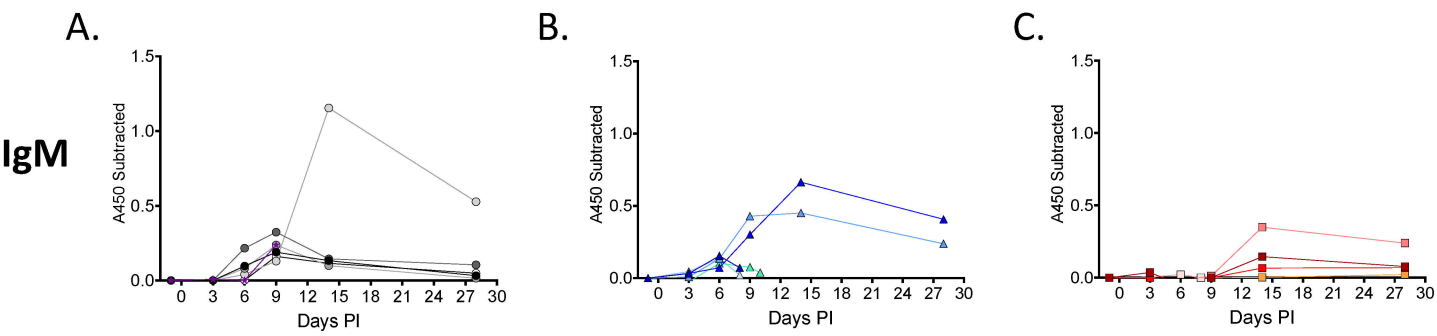

# ANTI-VP40

bioRxiv preprint doi: <https://doi.org/10.1101/2020.04.01.8273>; this version posted April 2, 2020. The copyright holder for this preprint (which was not certified by peer review) is the author/funder, who has granted bioRxiv a license to display the preprint in perpetuity. It is made available under aCC-BY-NC-ND 4.0 International license.

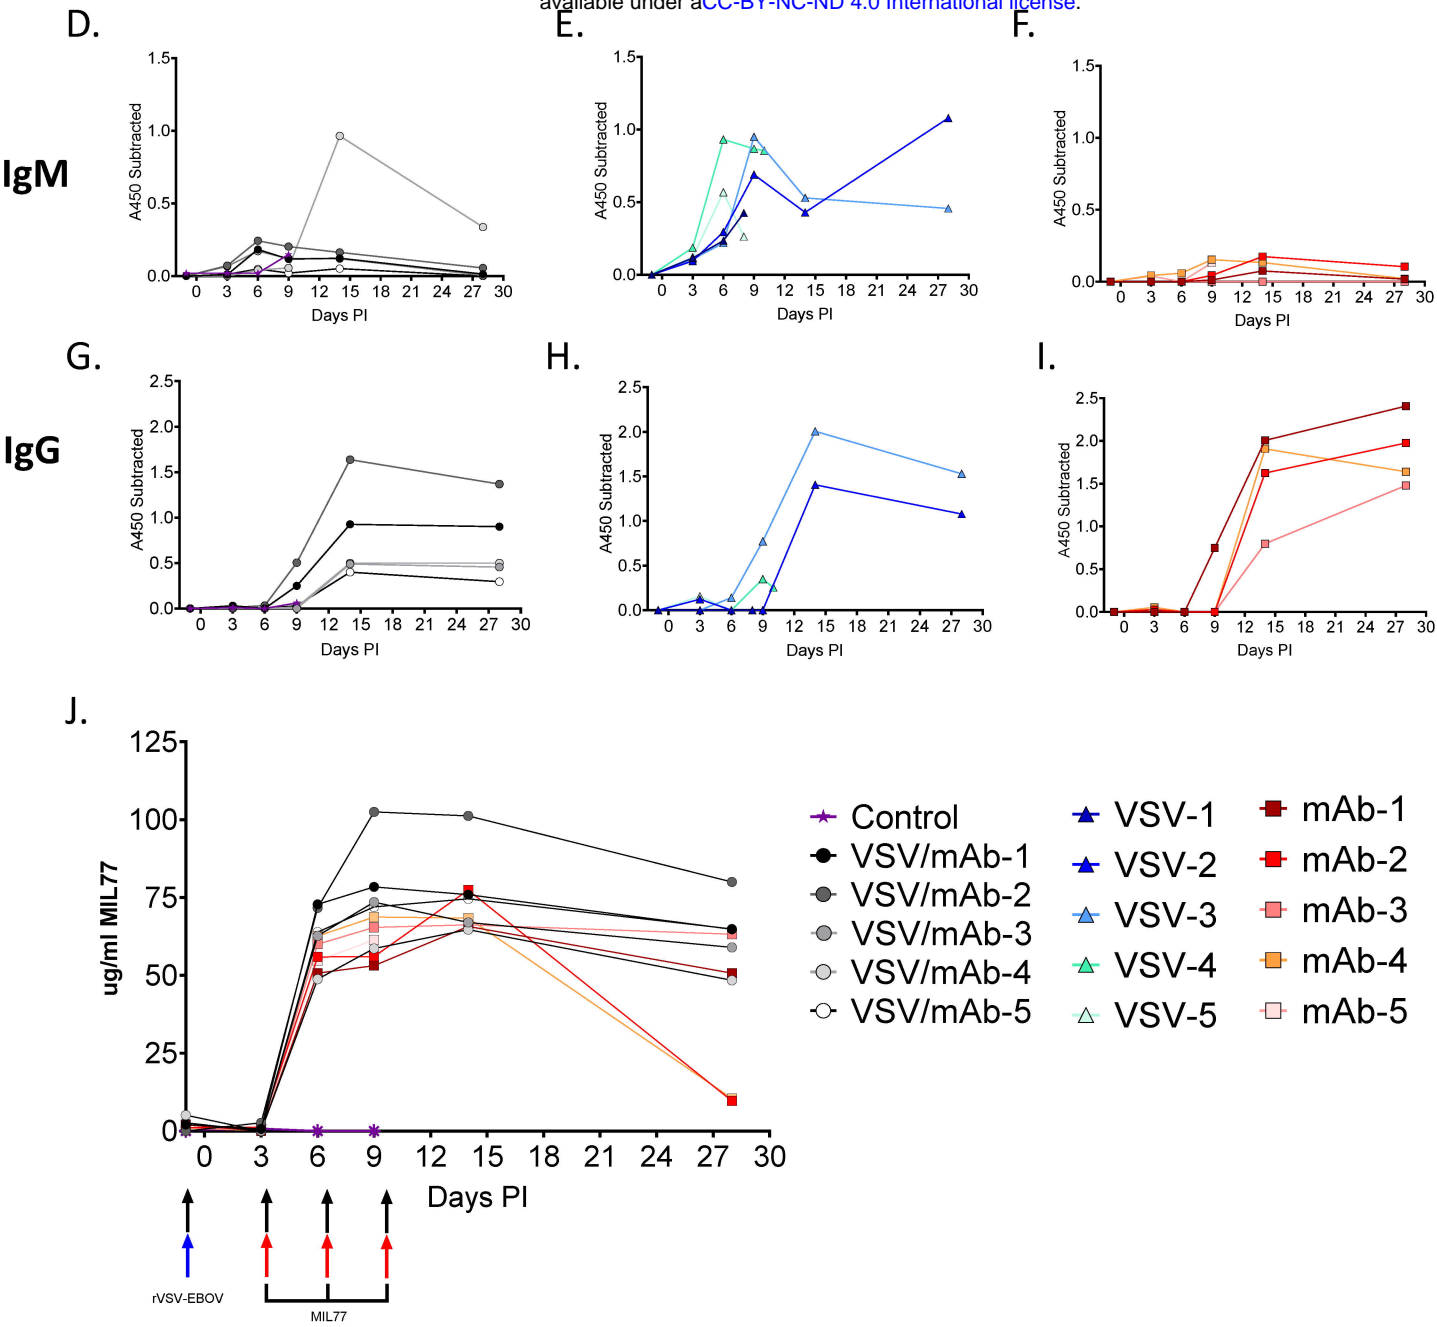

Source: https://www.biorxiv.org/content/10.1101/2020.04.01.018275v1.full.pdf
